# Supplementary material for: Corrosion Resistance in Artificial Perspiration of Cr-Based Decorative Coatings
Source: MDPI journal article supplement (doi:10.3390/nano13162346), 2023-08-15
Supplement: s1 [file s1]

Supplementary Figure S1

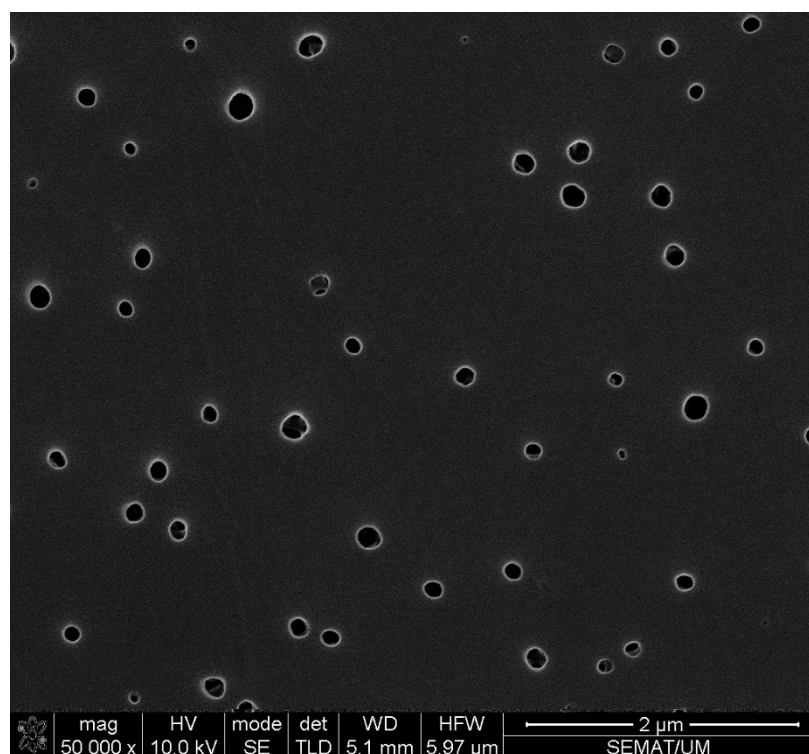

Figure S1 - SEM micrographs of the epoxy surface.

**CrN**  
before electrochemical tests

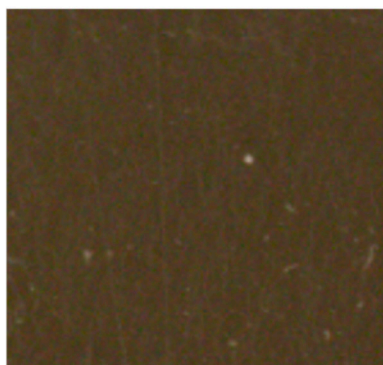

**CrN**  
after electrochemical tests

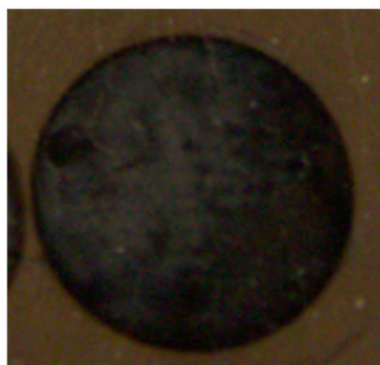

Figure S2 - By naked eye visualization of CrN sample before and after electrochemical testing
